# Supplementary material for: Spiked gold nanotriangles: formation, characterization and applications in surface-enhanced Raman spectroscopy and plasmon-enhanced catalysis
Source: PubMed Central journal article supplement (PMC9050016; doi:10.1039/d0ra00729c), 2020-02-25
Supplement: RA-010-D0RA00729C-s001.pdf [file RA-010-D0RA00729C-s001.pdf]

## Supporting Information

### **Spiked gold Nanotriangles: Formation, characterization and applications in surface-enhanced Raman spectroscopy and plasmon-enhanced catalysis**

Ferenc Liebig,<sup>a</sup> Radwan M. Sarhan,<sup>b,c,d</sup> Matias Bargheer,<sup>c</sup> Clemens N.Z. Schmitt,<sup>e</sup> Armen H. Poghosyan,<sup>f</sup> Aram A. Shahinyan,<sup>f</sup> Joachim Koetz<sup>a\*</sup>

<sup>a</sup> Institute for Chemistry, University of Potsdam, Karl-Liebknecht-Strasse 24-25, Haus 25, 14476 Potsdam, Germany

<sup>b</sup> Chemistry Department, Faculty of Science, Cairo University, Cairo 12613, Egypt

<sup>c</sup> Institute for Physics, University of Potsdam, Karl-Liebknecht-Strasse 24-25, Haus 27, 14476 Potsdam, Germany

<sup>d</sup> Humboldt-Universität zu Berlin, School of Analytical Sciences Adlershof (SALSA), Albert-Einstein-Str. 5-9, 10099 Berlin, Germany

<sup>e</sup> Department of Biomaterials, Max Planck Institute of Colloids and Interfaces, Am Mühlenberg 1, 14476 Potsdam, Germany

<sup>f</sup> International Scientific –Educational Center of National Academy of Sciences, M. Baghramyan Ave. 24d, 0019 Yerevan, Armenia

Corresponding author: Joachim Koetz

E-mail: koetz@uni-potsdam.de

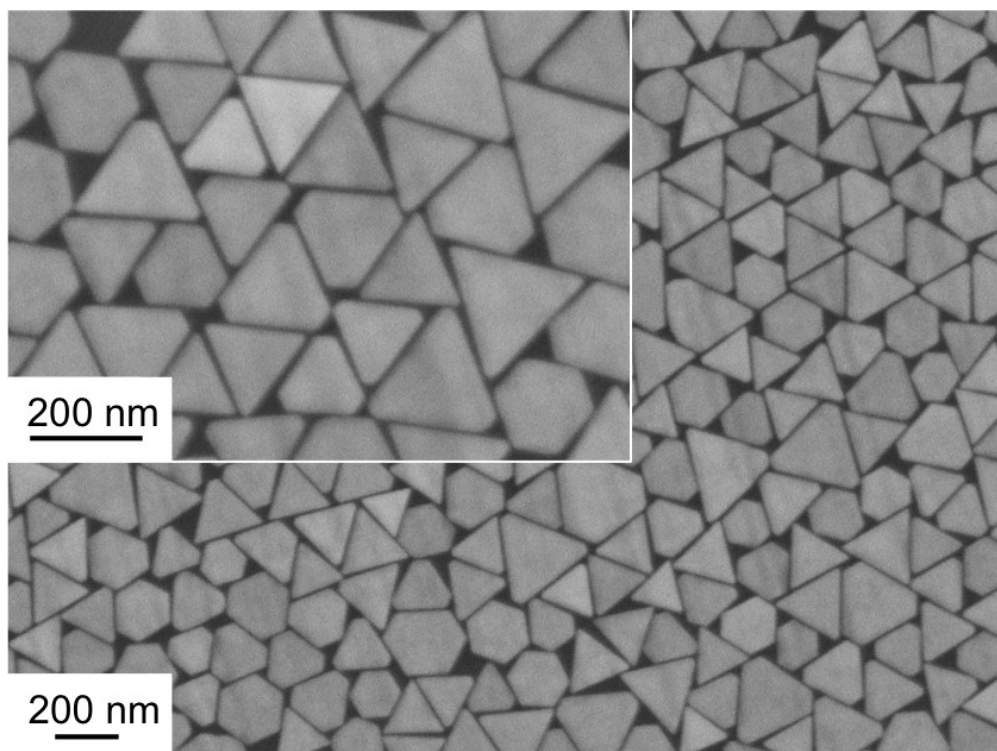

**Fig. S1** Low magnification SEM micrographs of gold nanoplatelets synthesized in the AOT/phospholipid-based template phase closely packed in a “perfect” monolayer on a Si substrate.

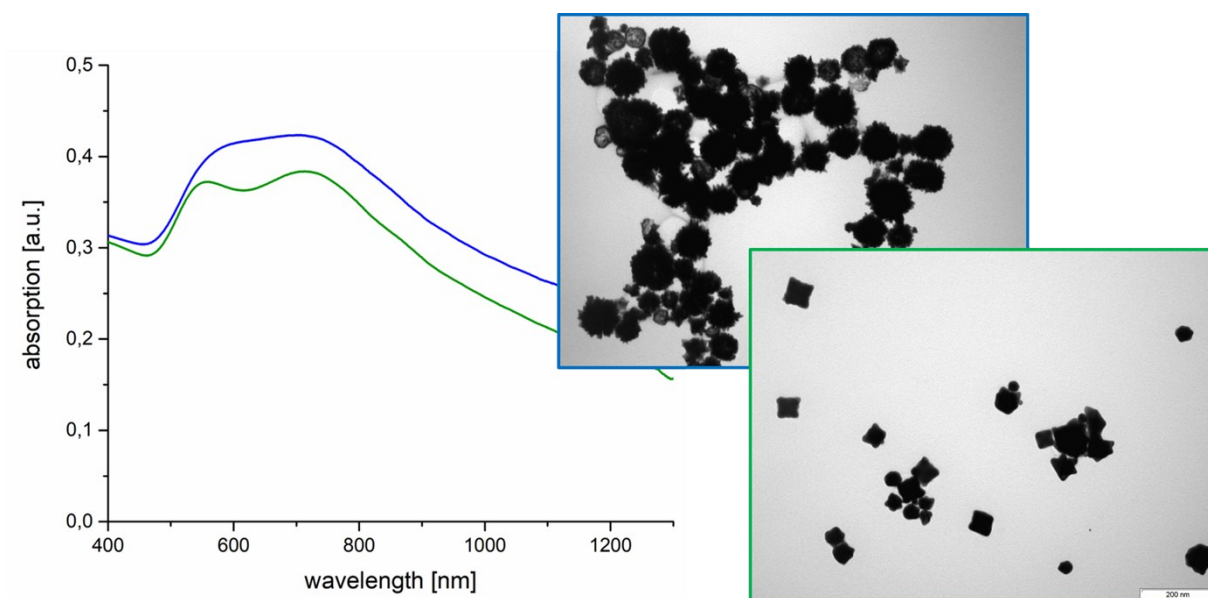

**Fig. S2** TEM micrograph and the corresponding UV-vis-NIR spectrum of gold nanoparticles synthesized by the reduction of  $\text{HAuCl}_4$  with AA in presence (blue) and absence (green) of  $\text{AgNO}_3$ .

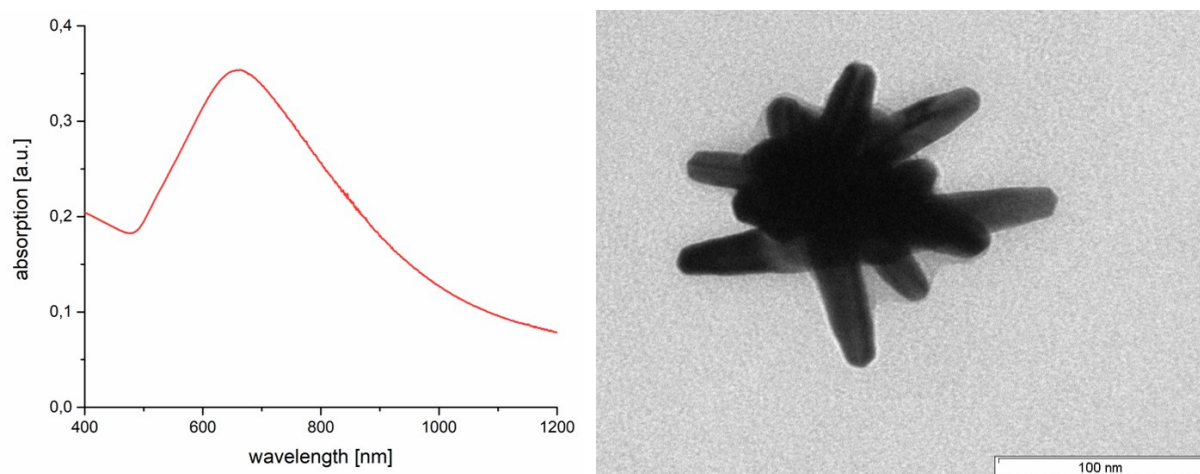

**Fig. S3** TEM micrograph of a gold nanostar and the corresponding UV-vis-NIR spectrum synthesized in a concentrated AOT solution.

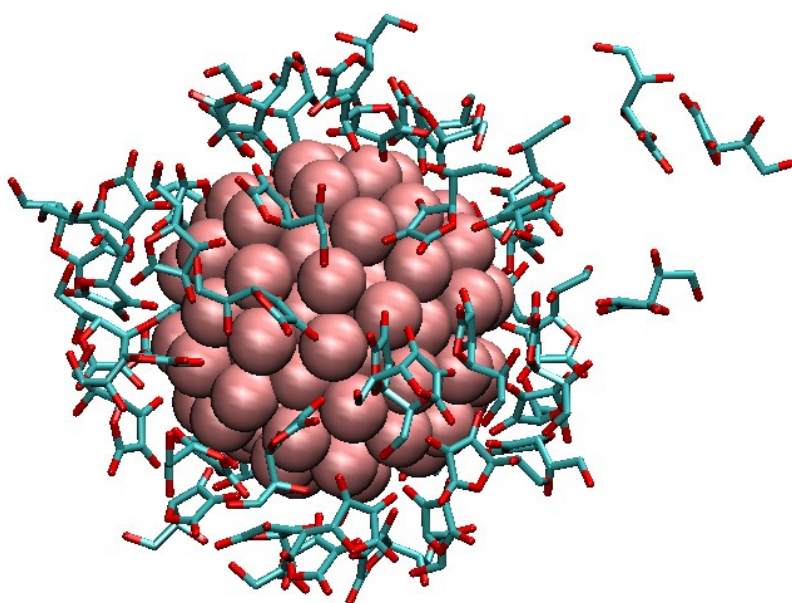

**Fig. S4** Snapshot of AA molecules adsorbed at the surface of a gold cluster. The corresponding colors are: cyan – AA carbon, red – AA oxygen, pink – gold surface. The gold atoms are rendered as sphere, the water molecules and hydrogen atoms were omitted for clarity, imitated via VMD package.<sup>36</sup>

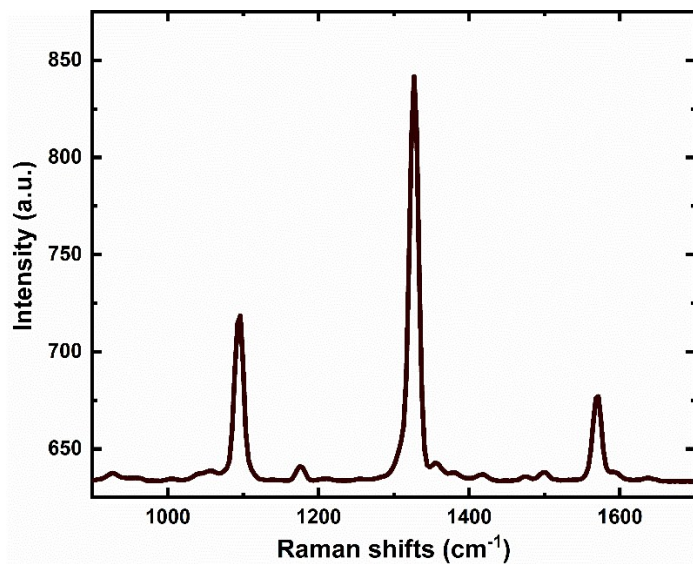

**Fig. S5** Raman signatures of the neat 4-NTP molecules.
